# Supplementary material for: Insects in agricultural greenhouses: a metagenomic analysis of microbes in Trialeurodes vaporariorum infesting tomato and cucumber crops
Source: Frontiers journal article supplement (doi:10.3389/fpls.2025.1581707), 2025-05-19
Supplement: Table_4.xlsx [file Table_4.xlsx]

## Sheet: Table 3
Supplementary Table 1: List of Identified Protein Domains in Trialeurodes vaporariorum Microbiome
#	InterPro ID	Description	Count	GO Terms
1	IPR006626	Parallel beta-helix repeat	30	-
2	IPR001844	Chaperonin Cpn60/GroEL	18	GO:0042026(InterPro)|GO:0140662(InterPro)
3	IPR013783	Immunoglobulin-like fold	17	-
4	IPR027417	P-loop containing nucleoside triphosphate hydrolase	13	-
5	IPR044016	Bacterial Ig-like domain 13	12	-
6	IPR012332	Autotransporter, pectate lyase C-like domain superfamily	11	-
7	IPR000565	DNA topoisomerase, type IIA, subunit B	10	GO:0003677(InterPro)|GO:0003918(InterPro)|GO:0005524(InterPro)|GO:0006265(InterPro)
8	IPR011050	Pectin lyase fold/virulence factor	9	-
9	IPR020575	Heat shock protein Hsp90, N-terminal	8	-
10	IPR001387	Cro/C1-type helix-turn-helix domain	8	-
11	IPR005483	Carbamoyl-phosphate synthase large subunit, CPSase domain	7	-
12	IPR000943	RNA polymerase sigma-70	7	GO:0003700(InterPro)|GO:0006352(InterPro)|GO:0006355(InterPro)
13	IPR001702	Porin, Gram-negative type	6	GO:0009279(InterPro)|GO:0015288(InterPro)|GO:0016020(InterPro)|GO:0034220(InterPro)
14	IPR003008	Tubulin/FtsZ, GTPase domain	6	GO:0005525(InterPro)
15	IPR001897	Porin, gammaproteobacterial	6	GO:0009279(InterPro)|GO:0015288(InterPro)|GO:0016020(InterPro)|GO:0034220(InterPro)
16	IPR005479	Carbamoyl-phosphate synthetase large subunit-like, ATP-binding domain	6	GO:0005524(InterPro)
17	IPR001525	C-5 cytosine methyltransferase	6	GO:0008168(InterPro)
18	IPR018149	Lysyl-tRNA synthetase, class II, C-terminal	5	GO:0000166(InterPro)|GO:0004824(InterPro)|GO:0005524(InterPro)|GO:0005737(InterPro)|GO:0006430(InterPro)
19	IPR006315	Outer membrane autotransporter barrel domain	5	GO:0019867(InterPro)
20	IPR004899	Pertactin, central region	5	-
21	IPR027413	GroEL-like equatorial domain superfamily	4	-
22	IPR027410	TCP-1-like chaperonin intermediate domain superfamily	4	-
23	IPR045864	Class II Aminoacyl-tRNA synthetase/Biotinyl protein ligase (BPL) and lipoyl protein ligase (LPL)	4	-
24	IPR027409	GroEL-like apical domain superfamily	4	-
25	IPR010982	Lambda repressor-like, DNA-binding domain superfamily	4	GO:0003677(InterPro)
26	IPR029063	S-adenosyl-L-methionine-dependent methyltransferase superfamily	4	-
27	IPR001404	Heat shock protein Hsp90 family	4	GO:0005524(InterPro)|GO:0006457(InterPro)|GO:0016887(InterPro)|GO:0051082(InterPro)|GO:0140662(InterPro)
28	IPR012340	Nucleic acid-binding, OB-fold	4	-
29	IPR036890	Histidine kinase/HSP90-like ATPase superfamily	4	-
30	IPR011607	Methylglyoxal synthase-like domain	3	-
31	IPR011049	Serralysin-like metalloprotease, C-terminal	3	-
32	IPR020974	CGT/MARTX, cysteine protease (CPD) domain	3	-
33	IPR036388	Winged helix-like DNA-binding domain superfamily	3	-
34	IPR000178	Translation initiation factor IF-2, bacterial-like	3	GO:0003743(InterPro)|GO:0003924(InterPro)|GO:0005525(InterPro)|GO:0006413(InterPro)
35	IPR005294	ATP synthase, F1 complex, alpha subunit	3	GO:0005524(PANTHER)|GO:0015986(InterPro)|GO:0015986(PANTHER)|GO:0043531(PANTHER)|GO:0045261(PANTHER)|GO:0045261(InterPro)|GO:0046933(InterPro)|GO:0046933(PANTHER), GO:0015986(InterPro)|GO:0045261(InterPro)|GO:0046933(InterPro)
36	IPR018181	Heat shock protein 70, conserved site	3	-
37	IPR000158	Cell division protein FtsZ	3	GO:0003924(InterPro)|GO:0005525(InterPro)
38	IPR003594	Histidine kinase/HSP90-like ATPase domain	3	-
39	IPR000432	DNA mismatch repair protein MutS, C-terminal	3	GO:0005524(InterPro)|GO:0006298(InterPro)|GO:0030983(InterPro)
40	IPR000792	Transcription regulator LuxR, C-terminal	3	GO:0006355(InterPro)
41	IPR005121	Ferrodoxin-fold anticodon-binding domain	3	-
42	IPR005147	tRNA synthetase, B5-domain	3	GO:0000287(InterPro)|GO:0003723(InterPro)|GO:0005524(InterPro)|GO:0006432(InterPro)
43	IPR013759	DNA topoisomerase, type IIA, subunit B, C-terminal	2	GO:0003677(InterPro)|GO:0003918(InterPro)|GO:0005524(InterPro)|GO:0006265(InterPro)
44	IPR015712	DNA-directed RNA polymerase, subunit 2	2	GO:0003899(InterPro)|GO:0006351(InterPro)|GO:0032549(InterPro)
45	IPR036925	Translation initiation factor IF-2, domain 3 superfamily	2	-
46	IPR037033	DNA-directed RNA polymerase, subunit 2, hybrid-binding domain superfamily	2	GO:0003677(InterPro)|GO:0003899(InterPro)|GO:0006351(InterPro)
47	IPR037034	RNA polymerase Rpb2, domain 2 superfamily	2	GO:0003677(InterPro)|GO:0003899(InterPro)|GO:0006351(InterPro)
48	IPR037196	HSP90, C-terminal domain	2	-
49	IPR002423	Chaperonin Cpn60/GroEL/TCP-1 family	2	GO:0005524(InterPro)
50	IPR013324	RNA polymerase sigma factor, region 3/4-like	2	-
51	IPR038383	CGT/MARTX, cysteine protease (CPD) domain superfamily	2	-
52	IPR002313	Lysine-tRNA ligase, class II	2	GO:0004824(InterPro)|GO:0005524(InterPro)|GO:0006430(InterPro)
53	IPR013126	Heat shock protein 70 family	2	GO:0005524(InterPro)|GO:0140662(InterPro)
54	IPR012761	RNA polymerase sigma factor RpoS	2	GO:0003677(InterPro)|GO:0003700(InterPro)|GO:0006352(InterPro)|GO:0006355(InterPro)|GO:0016987(InterPro)
55	IPR012725	Chaperone DnaK	2	GO:0005524(InterPro)|GO:0006457(InterPro)|GO:0051082(InterPro)
56	IPR003356	DNA methylase, adenine-specific	2	GO:0003677(InterPro)|GO:0008170(InterPro)
57	IPR011761	ATP-grasp fold	2	GO:0005524(InterPro)|GO:0046872(InterPro)
58	IPR036914	Methylglyoxal synthase-like domain superfamily	2	-
59	IPR039448	Right handed beta helix domain	2	-
60	IPR036897	Carbamoyl-phosphate synthetase, large subunit oligomerisation domain superfamily	2	-
61	IPR036286	LexA/Signal peptidase-like superfamily	2	-
62	IPR029047	Heat shock protein 70kD, peptide-binding domain superfamily	2	-
63	IPR024074	Argininosuccinate synthetase, catalytic/multimerisation domain body	2	GO:0004055(InterPro)
64	IPR000793	ATP synthase, alpha subunit, C-terminal	2	GO:0015986(InterPro)
65	IPR000795	Translational (tr)-type GTP-binding domain	2	GO:0003924(InterPro)|GO:0005525(InterPro)
66	IPR020805	Cell division protein FtsZ, conserved site	2	GO:0005525(InterPro)
67	IPR020568	Ribosomal protein uS5 domain 2-type superfamily	2	-
68	IPR001518	Argininosuccinate synthase	2	GO:0000050(PANTHER)|GO:0000053(PANTHER)|GO:0004055(InterPro)|GO:0004055(PANTHER)|GO:0005524(InterPro)|GO:0005737(PANTHER)|GO:0006526(InterPro)|GO:0006526(PANTHER), GO:0004055(InterPro)|GO:0005524(InterPro)|GO:0006526(InterPro)
69	IPR011557	DNA gyrase, subunit B	2	GO:0003677(InterPro)|GO:0003918(InterPro)|GO:0005524(InterPro)|GO:0005694(InterPro)|GO:0006265(InterPro)
70	IPR018370	Chaperonin Cpn60, conserved site	2	GO:0005524(InterPro)|GO:0006457(InterPro)
71	IPR036525	Tubulin/FtsZ, GTPase domain superfamily	2	-
72	IPR018223	Argininosuccinate synthase, conserved site	2	GO:0004055(InterPro)|GO:0005524(InterPro)|GO:0006526(InterPro)
73	IPR036678	MutS, connector domain superfamily	2	GO:0005524(InterPro)|GO:0006298(InterPro)|GO:0030983(InterPro)
74	IPR036690	Ferrodoxin-fold anticodon-binding domain superfamily	2	-
75	IPR016185	Pre-ATP-grasp domain superfamily	2	-
76	IPR016151	DNA mismatch repair protein MutS, N-terminal	2	GO:0005524(InterPro)|GO:0006298(InterPro)|GO:0030983(InterPro)
77	IPR009061	Putative DNA-binding domain superfamily	2	-
78	IPR006171	TOPRIM domain	2	-
79	IPR043129	ATPase, nucleotide binding domain	2	-
80	IPR006275	Carbamoyl-phosphate synthase, large subunit	2	-
81	IPR007642	RNA polymerase Rpb2, domain 2	2	GO:0003677(InterPro)|GO:0003899(InterPro)|GO:0006351(InterPro)
82	IPR009000	Translation protein, beta-barrel domain superfamily	2	-
83	IPR004532	Phenylalanine-tRNA ligase, class IIc, beta subunit, bacterial type	2	GO:0000287(InterPro)|GO:0004826(InterPro)|GO:0005524(InterPro)|GO:0006432(InterPro)
84	IPR006847	Translation initiation factor IF-2, N-terminal	2	-
85	IPR007696	DNA mismatch repair protein MutS, core	2	GO:0005524(InterPro)|GO:0006298(InterPro)|GO:0030983(InterPro)
86	IPR010090	Phage tail tape measure protein	2	-
87	IPR005480	Carbamoyl-phosphate synthetase, large subunit oligomerisation domain	2	-
88	IPR010243	DNA-directed RNA polymerase beta subunit, bacterial-type	2	GO:0003677(InterPro)|GO:0003899(InterPro)|GO:0006351(InterPro)
89	IPR005146	B3/B4 tRNA-binding domain	2	GO:0003723(InterPro)|GO:0004826(InterPro)
90	IPR041616	Phenylalanyl tRNA synthetase beta chain, core domain	2	-
91	IPR049353	DNA gyrase subunit B, hook	1	-
92	IPR035965	PAS domain superfamily	1	-
93	IPR036187	DNA mismatch repair protein MutS, core domain superfamily	1	-
94	IPR036121	ATPase, F1/V1/A1 complex, alpha/beta subunit, N-terminal domain superfamily	1	GO:0046034(InterPro)|GO:1902600(InterPro)
95	IPR036397	Ribonuclease H superfamily	1	GO:0003676(InterPro)
96	IPR053905	Elongation factor G-like, domain II	1	-
97	IPR050750	Cytosine-specific C5-methyltransferase	1	-
98	IPR051537	DNA Adenine N(4)/N(6)-Methyltransferase	1	-
99	IPR034154	Archaeal primase DnaG/twinkle-like, TOPRIM domain	1	-
100	IPR034690	Endolysin T4 type	1	GO:0003796(InterPro)|GO:0009253(InterPro)
101	IPR034160	DNA gyrase subunit B, TOPRIM domain	1	-
102	IPR048267	Arginosuccinate synthase-like, N-terminal domain	1	-
103	IPR033900	Porin domain, Gram-negative type	1	GO:0015288(InterPro)|GO:0016020(InterPro)
104	IPR033732	ATP synthase, F1 complex, alpha subunit nucleotide-binding domain	1	GO:0032559(InterPro)
105	IPR049996	Plasmid replication protein Slr7037-like	1	-
106	IPR029048	Heat shock protein 70kD, C-terminal domain superfamily	1	-
107	IPR050239	Sigma-70 factor family, RNA polymerase initiation factors	1	-
108	IPR054328	SseL-like, C-terminal domain	1	-
109	IPR048268	Arginosuccinate synthase C-terminal domain	1	-
110	IPR046673	Dermonecrotic toxin, N-terminal domain	1	-
111	IPR048188	YmfL-like	1	-
112	IPR037103	Tubulin/FtsZ-like, C-terminal domain	1	-
113	IPR051539	Type IV secretion system-coupling protein	1	-
114	IPR051082	Pentapeptide repeat and BTB/POZ domain-containing protein	1	-
115	IPR042107	DNA-directed RNA polymerase, beta subunit, external 1 domain superfamily	1	-
116	IPR041423	DNA gyrase subunit B insert domain	1	-
117	IPR039418	LexA-like	1	-
118	IPR038765	Papain-like cysteine peptidase superfamily	1	-
119	IPR029044	Nucleotide-diphospho-sugar transferases	1	-
120	IPR043688	SAR-endolysin-like	1	GO:0003796(InterPro)|GO:0016998(InterPro)
121	IPR038376	ATP synthase, alpha subunit, C-terminal domain superfamily	1	-
122	IPR051018	Bacteriophage Glycosyl Hydrolase 24	1	GO:0003796(PANTHER)
123	IPR044136	Lysine-tRNA ligase, class II, N-terminal	1	GO:0000166(InterPro)
124	IPR053058	Mulikevirus tape measure	1	-
125	IPR044145	Translation initiation factor IF-2, domain II	1	-
126	IPR045060	Phenylalanine-tRNA ligase, class IIc, beta subunit	1	GO:0004826(PANTHER)|GO:0004826(InterPro)|GO:0006432(InterPro)|GO:0006432(PANTHER)|GO:0009328(PANTHER)
127	IPR045061	Tubulin-like protein FtsZ/CetZ	1	GO:0003924(PANTHER)|GO:0003924(InterPro)|GO:0005525(InterPro)|GO:0005525(PANTHER)|GO:0005737(PANTHER)|GO:0032153(PANTHER)|GO:0051301(PANTHER)
128	IPR045076	DNA mismatch repair MutS	1	GO:0003690(PANTHER)|GO:0005524(InterPro)|GO:0005829(PANTHER)|GO:0006298(InterPro)|GO:0006298(PANTHER)|GO:0030983(PANTHER)|GO:0030983(InterPro)|GO:0140664(InterPro)
129	IPR050909	Bacterial Autotransporter Virulence Factors	1	-
130	IPR046461	Terminase large subunit-like, ATPase domain	1	-
131	IPR051706	Glycosyltransferase domain-containing protein	1	GO:0000030(PANTHER)|GO:0051999(PANTHER)
132	IPR046462	Terminase large subunit-like, endonuclease domain	1	GO:0004519(InterPro)
133	IPR051162	Type IV secretion system component	1	-
134	IPR052399	Phage Baseplate Assembly Protein	1	-
135	IPR050298	Gram-negative bacterial outer membrane porin	1	-
136	IPR015927	Peptidase S24/S26A/S26B/S26C	1	-
137	IPR024757	Cell division protein FtsZ, C-terminal	1	-
138	IPR009279	Portal protein, Mu bacteriophage	1	-
139	IPR008280	Tubulin/FtsZ, C-terminal	1	-
140	IPR007861	DNA mismatch repair protein MutS, clamp	1	GO:0005524(InterPro)|GO:0006298(InterPro)|GO:0030983(InterPro)
141	IPR007860	DNA mismatch repair protein MutS, connector domain	1	GO:0005524(InterPro)|GO:0006298(InterPro)|GO:0030983(InterPro)
142	IPR007695	DNA mismatch repair protein MutS-like, N-terminal	1	GO:0005524(InterPro)|GO:0006298(InterPro)|GO:0030983(InterPro)
143	IPR007645	RNA polymerase Rpb2, domain 3	1	GO:0003677(InterPro)|GO:0003899(InterPro)|GO:0006351(InterPro)
144	IPR007644	RNA polymerase, beta subunit, protrusion	1	GO:0003677(InterPro)|GO:0003899(InterPro)|GO:0006351(InterPro)
145	IPR007641	RNA polymerase Rpb2, domain 7	1	GO:0003677(InterPro)|GO:0003899(InterPro)|GO:0006351(InterPro)
146	IPR007630	RNA polymerase sigma-70 region 4	1	GO:0003700(InterPro)|GO:0006352(InterPro)|GO:0006355(InterPro)
147	IPR007627	RNA polymerase sigma-70 region 2	1	GO:0003700(InterPro)|GO:0006352(InterPro)|GO:0006355(InterPro)
148	IPR007624	RNA polymerase sigma-70 region 3	1	GO:0003700(InterPro)|GO:0006352(InterPro)|GO:0006355(InterPro)
149	IPR007577	Glycosyltransferase, DXD sugar-binding motif	1	-
150	IPR007121	RNA polymerase, beta subunit, conserved site	1	GO:0003677(InterPro)|GO:0003899(InterPro)|GO:0006351(InterPro)
151	IPR007120	DNA-directed RNA polymerase, subunit 2, hybrid-binding domain	1	GO:0003677(InterPro)|GO:0003899(InterPro)|GO:0006351(InterPro)
152	IPR006949	Baseplate protein J-like	1	-
153	IPR006195	Aminoacyl-tRNA synthetase, class II	1	-
154	IPR005748	DNA mismatch repair protein MutS	1	GO:0005524(InterPro)|GO:0006298(InterPro)|GO:0030983(InterPro)
155	IPR005225	Small GTP-binding domain	1	GO:0005525(InterPro)
156	IPR005021	Terminase large subunit-like	1	-
157	IPR004365	OB-fold nucleic acid binding domain, AA-tRNA synthetase-type	1	GO:0003676(InterPro)
158	IPR004364	Aminoacyl-tRNA synthetase, class II (D/K/N)	1	GO:0000166(InterPro)|GO:0004812(InterPro)|GO:0005524(InterPro)|GO:0006418(InterPro)
159	IPR004100	ATPase, F1/V1/A1 complex, alpha/beta subunit, N-terminal domain	1	GO:0046034(InterPro)|GO:1902600(InterPro)
160	IPR003688	Type IV secretion system protein TraG/VirD4	1	GO:0016020(InterPro)
161	IPR003450	Replication origin-binding protein	1	GO:0003688(InterPro)|GO:0005524(InterPro)|GO:0006260(InterPro)
162	IPR002547	tRNA-binding domain	1	GO:0000049(InterPro)
163	IPR002288	DNA gyrase B subunit, C-terminal	1	GO:0003677(InterPro)|GO:0003918(InterPro)|GO:0005524(InterPro)|GO:0006265(InterPro)
164	IPR002196	Glycoside hydrolase, family 24	1	GO:0003796(InterPro)|GO:0009253(InterPro)|GO:0016998(InterPro)
165	IPR001646	Pentapeptide repeat	1	-
166	IPR001241	DNA topoisomerase, type IIA	1	GO:0003677(InterPro)|GO:0003918(InterPro)|GO:0005524(InterPro)|GO:0006265(InterPro)
167	IPR000194	ATPase, F1/V1/A1 complex, alpha/beta subunit, nucleotide-binding domain	1	GO:0005524(InterPro)
168	IPR009042	RNA polymerase sigma-70 region 1.2	1	GO:0003677(InterPro)|GO:0003700(InterPro)|GO:0006352(InterPro)|GO:0006355(InterPro)|GO:0016987(InterPro)
169	IPR010106	Recombination-promoting nuclease RpnA	1	-
170	IPR023614	Porin domain superfamily	1	-
171	IPR011009	Protein kinase-like domain superfamily	1	-
172	IPR023434	Argininosuccinate synthase, type 1 subfamily	1	GO:0004055(InterPro)
173	IPR023366	ATP synthase subunit alpha, N-terminal domain-like superfamily	1	-
174	IPR023347	Lysozyme domain superfamily	1	GO:0003796(InterPro)
175	IPR023346	Lysozyme-like domain superfamily	1	-
176	IPR023115	Translation initiation factor IF- 2, domain 3	1	-
177	IPR022038	Ig-like domain, bacterial type	1	-
178	IPR020825	Phenylalanyl-tRNA synthetase-like, B3/B4	1	-
179	IPR020003	ATPase, alpha/beta subunit, nucleotide-binding domain, active site	1	GO:0005524(InterPro)
180	IPR019805	Heat shock protein Hsp90, conserved site	1	GO:0005524(InterPro)|GO:0006457(InterPro)|GO:0051082(InterPro)
181	IPR019462	DNA-directed RNA polymerase, beta subunit, external 1 domain	1	GO:0003899(InterPro)|GO:0006351(InterPro)
182	IPR018774	Bacteriophage Mu, GpT	1	-
183	IPR018522	DNA topoisomerase, type IIA, conserved site	1	GO:0003677(InterPro)|GO:0003918(InterPro)|GO:0005524(InterPro)|GO:0006265(InterPro)
184	IPR018316	Tubulin/FtsZ, 2-layer sandwich domain	1	-
185	IPR018145	CagE, TrbE, VirB component of type IV transporter system, central domain	1	GO:0005524(InterPro)
186	IPR018117	DNA methylase, C-5 cytosine-specific, active site	1	-
187	IPR017261	DNA mismatch repair protein MutS/MSH	1	GO:0006298(InterPro)|GO:0030983(InterPro)
188	IPR016032	Signal transduction response regulator, C-terminal effector	1	GO:0003677(InterPro)|GO:0006355(InterPro)
189	IPR015760	Translation initiation factor IF- 2	1	GO:0003743(PANTHER)|GO:0005737(PANTHER)|GO:0005829(PANTHER)|GO:0006413(PANTHER)
190	IPR014819	Primase, C-terminal 2	1	GO:0016817(InterPro)
191	IPR014729	Rossmann-like alpha/beta/alpha sandwich fold	1	-
192	IPR014724	RNA polymerase Rpb2, OB-fold	1	GO:0003899(InterPro)
193	IPR014721	Small ribosomal subunit protein uS5 domain 2-type fold, subgroup	1	-
194	IPR014284	RNA polymerase sigma-70-like domain	1	GO:0003700(InterPro)|GO:0006352(InterPro)|GO:0006355(InterPro)
195	IPR013760	DNA topoisomerase, type IIA-like domain superfamily	1	GO:0003918(InterPro)|GO:0005524(InterPro)
196	IPR013656	PAS fold-4	1	-
197	IPR013575	Initiation factor 2 associated domain, bacterial	1	-
198	IPR013506	DNA topoisomerase, type IIA, subunit B, domain 2	1	GO:0003677(InterPro)|GO:0003918(InterPro)|GO:0005524(InterPro)|GO:0006265(InterPro)
199	IPR013491	Tape measure protein N-terminal	1	-
200	IPR013325	RNA polymerase sigma factor, region 2	1	GO:0003700(InterPro)|GO:0006352(InterPro)|GO:0006355(InterPro)
